# Supplementary material for: Copy number variation at the 7q11.23 segmental duplications is a susceptibility factor for the Williams-Beuren syndrome deletion
Source: HighWire-hosted journal article supplement (doi:10.1101/gr.073197.107), 2008-02-21
Supplement: Cusco_Supplementary_Figure_1.pdf [file Cusco_Supplementary_Figure_1.pdf]

Supplementary Figure 1

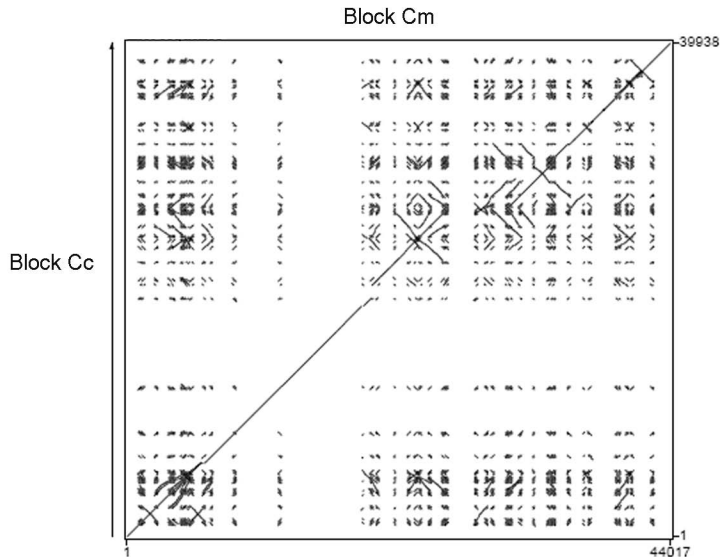

Results of Pipmaker analysis. The homologous region (aprox. 44Kb) between Blocks Cc and Cm was analysed. The Block Cc sequence has been plotted against a Block Cm sequence. Note the much higher homology of the first part of the blocks (aprox.17Kb;98.8%) compared with the last 22kb (95.2%).

PIPMAKER analysis was performed at the web site <http://nog.cse.psu.edu/cgi-bin/pipmaker?advanced>, according to the authors' instructions .
